# Supplementary material
Source: MDPI journal article supplement (https://www.mdpi.com/search?q=ijerph-16-04167)
Supplement: s001 [file ijerph-16-04167-s001.pdf]

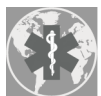

# Supplementary Material: Post-Traumatic Stress and School Adaptation in Adolescent Survivors Five Years after the 2010 Yushu Earthquake in China

**Table S1.** Univariate analyses of ASAS and subscales among adolescent survivors ( $N = 1976$ ).

| Variables *                              | 1 <sup>a</sup>            | 2 <sup>a</sup> | 3 <sup>a</sup> | 4 <sup>a</sup> | 5 <sup>a</sup> | 6 <sup>a</sup> | 7 <sup>a</sup> | 8 <sup>a</sup> |            |
|------------------------------------------|---------------------------|----------------|----------------|----------------|----------------|----------------|----------------|----------------|------------|
|                                          | <i>n</i> (%)              | <i>n</i> (%)   | <i>n</i> (%)   | <i>n</i> (%)   | <i>n</i> (%)   | <i>n</i> (%)   | <i>n</i> (%)   | <i>n</i> (%)   |            |
| Gender                                   | Female ( <i>n</i> = 1146) | 796 (56.4)     | 353 (50.1)     | 839 (57.1)     | 209 (56.0)     | 265 (52.4)     | 230 (54.1)     | 405 (54.1)     | 214 (52.8) |
|                                          | Male ( <i>n</i> = 830)    | 616 (43.6)     | 351 (49.9)     | 630 (42.9)     | 164 (44.0)     | 241 (47.6)     | 195 (45.9)     | 343 (45.9)     | 191 (47.2) |
| Grade                                    | Senior ( <i>n</i> = 1342) | 935 (66.2)     | 419 (49.5)     | 955 (65.0)     | 250 (67.0)     | 283 (55.9)     | 269 (63.3)     | 452 (60.4)     | 255 (63.0) |
|                                          | Junior ( <i>n</i> = 634)  | 477 (33.8)     | 285 (50.5)     | 514 (35.0)     | 123 (33.0)     | 223 (44.1)     | 156 (36.7)     | 296 (39.6)     | 150 (37.0) |
| Injury                                   | No ( <i>n</i> = 1673)     | 1188 (84.1)    | 569 (80.8)     | 1234 (84.0)    | 313 (83.9)     | 402 (79.4)     | 366 (86.1)     | 615 (82.2)     | 332 (82.0) |
|                                          | Yes ( <i>n</i> = 303)     | 224 (15.9)     | 135 (19.2)     | 235 (16.0)     | 60 (16.1)      | 104 (20.6)     | 59 (13.9)      | 133 (17.8)     | 73 (18.0)  |
| Injury of a family member                | No ( <i>n</i> = 1633)     | 1159 (71.0)    | 562 (34.4)     | 1198 (73.4)    | 309 (18.9)     | 413 (25.3)     | 356 (21.8)     | 609 (37.3)     | 332 (20.3) |
|                                          | Yes ( <i>n</i> = 343)     | 253 (73.8)     | 142 (41.4)     | 271 (79.0)     | 64 (18.7)      | 93 (27.1)      | 69 (20.1)      | 139 (40.5)     | 73 (21.3)  |
| Buried under debris                      | No ( <i>n</i> = 1801)     | 1276 (90.4)    | 625 (88.8)     | 1330 (90.5)    | 335 (89.8)     | 447 (88.3)     | 393 (92.5)     | 674 (90.1)     | 368 (90.9) |
|                                          | Yes ( <i>n</i> = 175)     | 136 (9.6)      | 79 (11.2)      | 139 (9.5)      | 38 (10.2)      | 59 (11.7)      | 32 (7.5)       | 74 (9.9)       | 37 (9.1)   |
| Bereavement                              | No ( <i>n</i> = 1744)     | 1246 (88.2)    | 604 (85.8)     | 1292 (88.0)    | 325 (87.1)     | 445 (87.9)     | 373 (87.8)     | 647 (86.5)     | 351 (86.7) |
|                                          | Yes ( <i>n</i> = 232)     | 166 (11.8)     | 100 (14.2)     | 177 (12.0)     | 48 (12.9)      | 61 (12.1)      | 52 (12.2)      | 101 (13.5)     | 54 (13.3)  |
| Property damage                          | No ( <i>n</i> = 1360)     | 968 (68.6)     | 492 (70.0)     | 1000 (68.1)    | 287 (76.9)     | 352 (69.6)     | 314 (73.9)     | 511 (68.3)     | 275 (67.9) |
|                                          | Yes ( <i>n</i> = 616)     | 444 (31.4)     | 212 (30.0)     | 469 (31.9)     | 86 (23.1)      | 154 (30.4)     | 111 (26.1)     | 237 (31.7)     | 130 (32.1) |
| Living in hardest-hit area               | No ( <i>n</i> = 1333)     | 940 (66.6)     | 497 (70.6)     | 985 (67.1)     | 264 (70.8)     | 339 (67.0)     | 291 (68.5)     | 506 (67.6)     | 273 (67.4) |
|                                          | Yes ( <i>n</i> = 643)     | 472 (33.4)     | 217 (29.4)     | 484 (32.9)     | 109 (29.2)     | 167 (33.0)     | 134 (31.5)     | 242 (32.4)     | 132 (32.6) |
| Involved in post-disaster reconstruction | No ( <i>n</i> = 1270)     | 913 (64.7)     | 468 (66.5)     | 939 (63.9)     | 262 (70.2)     | 344 (68.0)     | 303 (71.3)     | 502 (67.1)     | 286 (70.6) |
|                                          | Yes ( <i>n</i> = 706)     | 499 (35.3)     | 236 (33.5)     | 530 (36.1)     | 111 (29.8)     | 162 (32.0)     | 122 (28.7)     | 246 (32.9)     | 119 (29.4) |
| PTSD                                     | No ( <i>n</i> = 1590)     | 1187 (84.1)    | 584 (83.0)     | 1211 (82.4)    | 238 (63.8)     | 400 (79.1)     | 296 (69.6)     | 605 (80.9)     | 264 (65.2) |
|                                          | Yes ( <i>n</i> = 386)     | 225 (15.9)     | 120 (17.0)     | 258 (17.6)     | 135 (36.2)     | 106 (20.9)     | 129 (30.4)     | 143 (19.1)     | 141 (34.8) |
| <b>Total</b>                             |                           | 1412 (71.5)    | 704 (35.6)     | 1469 (74.3)    | 373 (18.9)     | 506 (25.6)     | 425 (21.5)     | 748 (37.9)     | 405 (20.5) |

\* Data of students using the ASAS are shown. a: 1—stress from teacher; 2—principle breach; 3—academic anxiety; 4—sense of justice; 5—peer relationship; 6—school attractiveness; 7—competition awareness; 8—teacher—student relationship. ASAS: Adolescent’s School Adaptation Scale; PTSD: Post-Traumatic Stress Disorder.

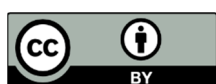

© 2019 by the authors. Submitted for possible open access publication under the terms and conditions of the Creative Commons Attribution (CC BY) license (<http://creativecommons.org/licenses/by/4.0/>).
